# Supplementary material
Source: HighWire-hosted journal article supplement (http://dmd.aspetjournals.org/highwire/filestream/65919/field_highwire_adjunct_files/0/DMD25759_Supplemental_Fig_1.pdf)

Supplemental Figure 1. 24OHChol bound in the SULT2A1 monomer with the 3-OH oriented towards the PAP molecule. The first two orientations with the lowest BFE are shown. PAP is shown in yellow. 24OHChol is shown in magenta.

#1

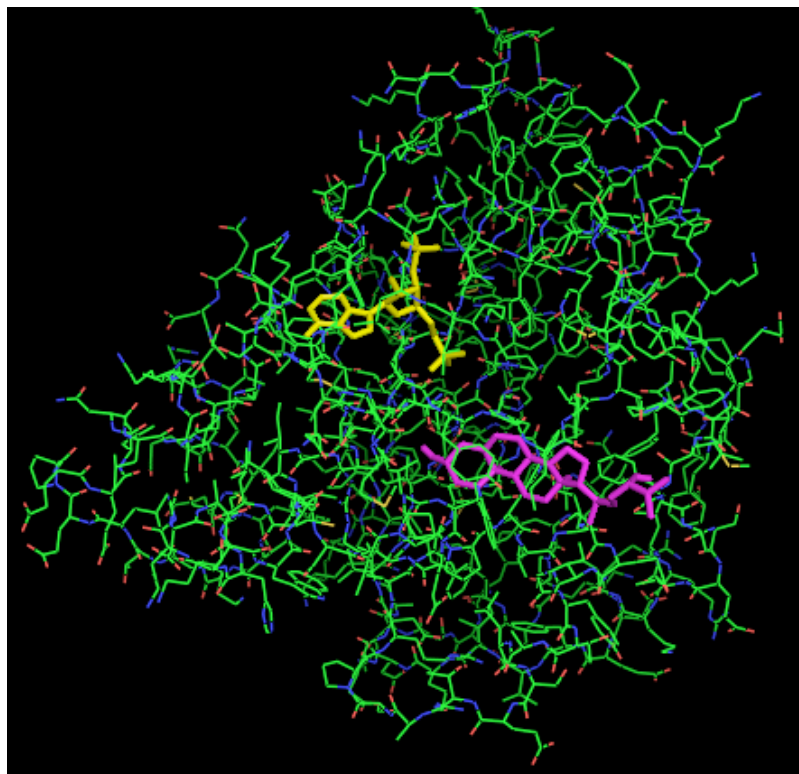

#2

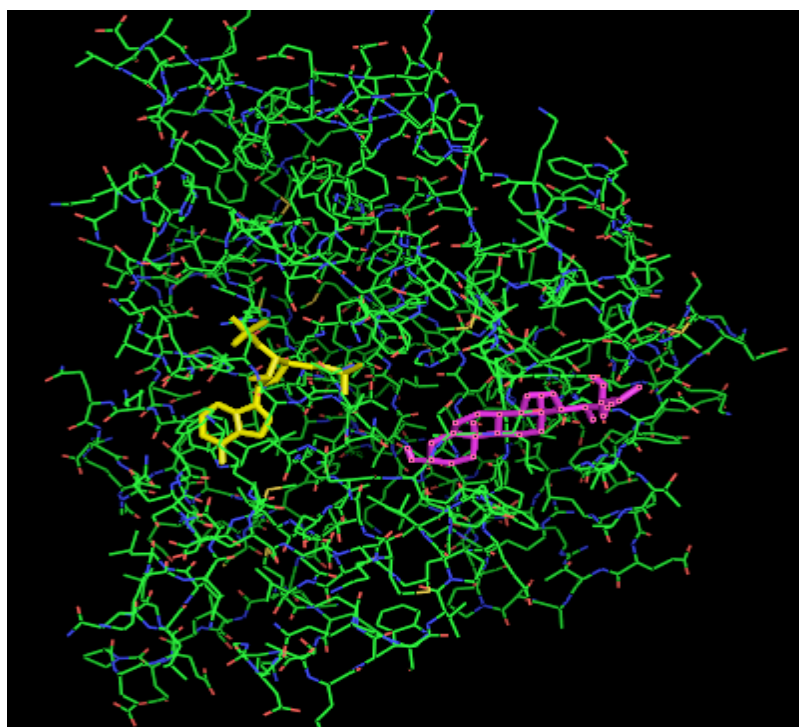

Supplement: DMD25759_Supplemental_Fig_1.pdf [file DMD25759_Supplemental_Fig_1.pdf]
